# Supplementary material
Source: PubMed Central journal article supplement (PMC183844)
Supplement: 1477-7525-1-28-S1.pdf [file 1477-7525-1-28-S1.pdf]

## Menopause Rating Scale (MRS): Evaluation Form

Once the MRS questionnaire is completed by the respondent, the following form can be used if an evaluation on paper is intended. However, we recommend a computerized evaluation.

The scoring scheme of the MRS scale is simple: The questionnaire has for each of the 11 items an option to check one of 5 degrees of severity of symptoms (severity 0 [none]...5 [very severe] points at the questionnaire). Put the scoring points of each of the items into the form below.

The composite scores for each of the three dimensions (sub-scales) is based on adding up the scores of the items of the respective dimensions. The composite score (total score) is the sum of the three dimension scores. The three dimensions, i.e. psychological, somato-vegetative, and urogenital subscale, and their corresponding question numbers are detailed in the form.

This form explains how the total sum-score and the sum-scores of the subscales are determined: Add up the severity scoring points from each of items belonging to one of the subscales (indicated by an arrow into a blank field) to get the sum-score for the respective subscale.

The "total score" is the sum of the sum-scores of the three subscales.

| Question Number                                            | Score | Psychological Subscale | Somatic Subscale      | Urogenital Subscale    |
|------------------------------------------------------------|-------|------------------------|-----------------------|------------------------|
| 1                                                          | —     |                        | → .....               |                        |
| 2                                                          | —     |                        | → .....               |                        |
| 3                                                          | —     |                        | → .....               |                        |
| 4                                                          | —     | → .....                |                       |                        |
| 5                                                          | —     | → .....                |                       |                        |
| 6                                                          | —     | → .....                |                       |                        |
| 7                                                          | —     | → .....                |                       |                        |
| 8                                                          | —     |                        |                       | → .....                |
| 9                                                          | —     |                        |                       | → .....                |
| 10                                                         | —     |                        |                       | → .....                |
| 11                                                         | —     |                        | → .....               |                        |
| Sum of scores in subscales                                 |       | Sum-score PSYCH .....  | Sum-score SOMAT ..... | Sum-score UROGEN ..... |
| <b>Total sum of scores of all subscales = Total score:</b> |       |                        |                       |                        |
