# Supplementary material
Source: PubMed Central journal article supplement (PMC183844)
Supplement: 1477-7525-1-28-S2.pdf [file 1477-7525-1-28-S2.pdf]

## Menopause Rating Scale (MRS)

Welche der folgenden Beschwerden haben Sie zur Zeit?  
 Kreuzen Sie bitte jede Beschwerde an und wie stark Sie davon betroffen sind. Wenn Sie eine Beschwerde nicht haben, kreuzen Sie bitte „keine“ an.

**Beschwerden:**

|             | keine | leicht | mittel | stark | sehr stark |
|-------------|-------|--------|--------|-------|------------|
|             | ----- | -----  | -----  | ----- |            |
| Punktwert = | 0     | 1      | 2      | 3     | 4          |

- |                                                                                                                                            |                          |                          |                          |                          |                          |
|--------------------------------------------------------------------------------------------------------------------------------------------|--------------------------|--------------------------|--------------------------|--------------------------|--------------------------|
| 1. Wallungen, Schwitzen (Aufsteigende Hitze, Schweißausbrüche) .....                                                                       | <input type="checkbox"/> |
| 2. Herzbeschwerden (Herzklopfen, Herzrasen, Herzstolpern, Herzbeklemmungen) .....                                                          | <input type="checkbox"/> |
| 3. Schlafstörungen (Einschlafstörungen, Durchschlafstörungen, zu frühes Aufwachen) .....                                                   | <input type="checkbox"/> |
| 4. Depressive Verstimmung (Mutlosigkeit, Traurigkeit, Weinerlichkeit, Antriebslosigkeit, Stimmungsschwankungen) .....                      | <input type="checkbox"/> |
| 5. Reizbarkeit (Nervosität, innere Anspannung, Aggressivität) .....                                                                        | <input type="checkbox"/> |
| 6. Ängstlichkeit (innere Unruhe, Panik) .....                                                                                              | <input type="checkbox"/> |
| 7. Körperliche und geistige Erschöpfung (allgemeine Leistungsminderung, Gedächtnisminderung, Konzentrationsschwäche, Vergeßlichkeit) ..... | <input type="checkbox"/> |
| 8. Sexualprobleme (Veränderung des sexuellen Verlangens, der sexuellen Betätigung und Befriedigung) .....                                  | <input type="checkbox"/> |
| 9. Harnwegsbeschwerden (Beschwerden beim Wasserlassen, häufiger Harndrang, unwillkürlicher Harnabgang) .....                               | <input type="checkbox"/> |
| 10. Trockenheit der Scheide (Trockenheitsgefühl oder Brennen der Scheide, Beschwerden beim Geschlechtsverkehr) .....                       | <input type="checkbox"/> |
| 11. Gelenk- und Muskelbeschwerden (Schmerzen im Bereich der Gelenke, rheuma-ähnliche Beschwerden) .....                                    | <input type="checkbox"/> |
