# Supplementary material
Source: PubMed Central journal article supplement (PMC183844)
Supplement: 1477-7525-1-28-S3.pdf [file 1477-7525-1-28-S3.pdf]

## Menopause Rating Scale (MRS)

Which of the following symptoms apply to you at this time? Please, mark the appropriate box for each symptom. For symptoms that do not apply, please mark 'none'.

**Symptoms:**

|                                                                                                                                      | none                     | mild                     | moderate                 | severe                   | very severe              |
|--------------------------------------------------------------------------------------------------------------------------------------|--------------------------|--------------------------|--------------------------|--------------------------|--------------------------|
|                                                                                                                                      | -----                    | -----                    | -----                    | -----                    | -----                    |
| <b>Score =</b>                                                                                                                       | <b>0</b>                 | <b>1</b>                 | <b>2</b>                 | <b>3</b>                 | <b>4</b>                 |
| 1. Hot flushes, sweating (episodes of sweating) .....                                                                                | <input type="checkbox"/> | <input type="checkbox"/> | <input type="checkbox"/> | <input type="checkbox"/> | <input type="checkbox"/> |
| 2. Heart discomfort (unusual awareness of heart beat, heart skipping, heart racing, tightness).....                                  | <input type="checkbox"/> | <input type="checkbox"/> | <input type="checkbox"/> | <input type="checkbox"/> | <input type="checkbox"/> |
| 3. Sleep problems (difficulty in falling asleep, difficulty in sleeping through, waking up early) .....                              | <input type="checkbox"/> | <input type="checkbox"/> | <input type="checkbox"/> | <input type="checkbox"/> | <input type="checkbox"/> |
| 4. Depressive mood (feeling down, sad, on the verge of tears, lack of drive, mood swings) .....                                      | <input type="checkbox"/> | <input type="checkbox"/> | <input type="checkbox"/> | <input type="checkbox"/> | <input type="checkbox"/> |
| 5. Irritability (feeling nervous, inner tension, feeling aggressive) .....                                                           | <input type="checkbox"/> | <input type="checkbox"/> | <input type="checkbox"/> | <input type="checkbox"/> | <input type="checkbox"/> |
| 6. Anxiety (inner restlessness, feeling panicky).....                                                                                | <input type="checkbox"/> | <input type="checkbox"/> | <input type="checkbox"/> | <input type="checkbox"/> | <input type="checkbox"/> |
| 7. Physical and mental exhaustion (general decrease in performance, impaired memory, decrease in concentration, forgetfulness) ..... | <input type="checkbox"/> | <input type="checkbox"/> | <input type="checkbox"/> | <input type="checkbox"/> | <input type="checkbox"/> |
| 8. Sexual problems (change in sexual desire, in sexual activity and satisfaction) .....                                              | <input type="checkbox"/> | <input type="checkbox"/> | <input type="checkbox"/> | <input type="checkbox"/> | <input type="checkbox"/> |
| 9. Bladder problems (difficulty in urinating, increased need to urinate, bladder incontinence).....                                  | <input type="checkbox"/> | <input type="checkbox"/> | <input type="checkbox"/> | <input type="checkbox"/> | <input type="checkbox"/> |
| 10. Dryness of vagina (sensation of dryness or burning in the vagina, difficulty with sexual intercourse) .....                      | <input type="checkbox"/> | <input type="checkbox"/> | <input type="checkbox"/> | <input type="checkbox"/> | <input type="checkbox"/> |
| 11. Joint and muscular discomfort (pain in the joints, rheumatoid complaints) .....                                                  | <input type="checkbox"/> | <input type="checkbox"/> | <input type="checkbox"/> | <input type="checkbox"/> | <input type="checkbox"/> |
