# Supplementary material
Source: PubMed Central journal article supplement (PMC183844)
Supplement: 1477-7525-1-28-S4.pdf [file 1477-7525-1-28-S4.pdf]

## Menopause Rating Scale (MRS)

Vilka av följande symtom stämmer in på dig för tillfället? Sätt ett kryss i den ruta som passar bäst för varje symptom. För symptom som inte är aktuella, markera „inga“

**Symtom:**

**mycket**

inga    lindriga    måttliga    svåra    sv

åra

|-----|-----|-----|-----|  
0            1            2            3            4

- |     |                                                                                                                                    |                          |                          |                          |                          |                          |
|-----|------------------------------------------------------------------------------------------------------------------------------------|--------------------------|--------------------------|--------------------------|--------------------------|--------------------------|
| 1.  | Blodvullningar, svettningar (tillfälliga svettningar) .....                                                                        | <input type="checkbox"/> |
| 2.  | Hjärtproblem (ovanlig medvetenhet av hjärtslag, hjärtat hoppar över ett slag, hjärtklappning, spändhet??) .....                    | <input type="checkbox"/> |
| 3.  | Sömnpblem (svårigheter att somna, svårigheter att sova hela natten, vaknar tidigt) .....                                           | <input type="checkbox"/> |
| 4.  | Deprimerad (känner sig nere, ledsen, på gränsen att börja gråta, brist på energi, humörsvängningar) .....                          | <input type="checkbox"/> |
| 5.  | Retlighet (känner nervositet, inre spänningar, känner aggressivitet) .....                                                         | <input type="checkbox"/> |
| 6.  | Oro (inre rastlöshet, panikkänslor) .....                                                                                          | <input type="checkbox"/> |
| 7.  | Fysisk och mental utmattning (försämrad prestationsförmåga i allmänhet, försämrat minne, koncentrationssvårigheter, glömska) ..... | <input type="checkbox"/> |
| 8.  | Sexuella problem (ändring av sexuell lust, i sexuell aktivitet och tillfredsställelse) .....                                       | <input type="checkbox"/> |
| 9.  | Urinblåseproblem (svårigheter att urinera, ökat behov av att urinera, inkontinens) .....                                           | <input type="checkbox"/> |
| 10. | Slidtorrhet (torr eller brännande känsla i slidan, svårigheter vid samlag) .....                                                   | <input type="checkbox"/> |
| 11. | Led- och muskelbesvär (ont i lederna, reumatiska besvär) .....                                                                     | <input type="checkbox"/> |
