# Supplementary material
Source: PubMed Central journal article supplement (PMC183844)
Supplement: 1477-7525-1-28-S5.pdf [file 1477-7525-1-28-S5.pdf]

## Menopause Rating Scale (MRS)

En ce moment, présentez-vous les symptômes suivants? Pour chacun des symptômes, veuillez cochez

la case 'aucun(e)', si vous n'en souffrez pas actuellement

la case qui vous semble le mieux correspondre à votre cas, si vous présentez le symptôme

### Symptômes:

|                                                                                                                                                                                    | aucun(e)                 | léger                    | modéré                   | fort                     | Trés fort                |
|------------------------------------------------------------------------------------------------------------------------------------------------------------------------------------|--------------------------|--------------------------|--------------------------|--------------------------|--------------------------|
|                                                                                                                                                                                    | -----                    | -----                    | -----                    | -----                    |                          |
|                                                                                                                                                                                    | 0                        | 1                        | 2                        | 3                        | 4                        |
| 1. Bouffées de chaleur, transpiration<br>(périodes de transpiration) .....                                                                                                         | <input type="checkbox"/> |
| 2. Gène au niveau du cœur (Battements de cœur<br>inhabituels, palpitations, battements irréguliers,<br>oppression) .....                                                           | <input type="checkbox"/> |
| 3. Problèmes de sommeil (difficultés pour s'endormir, diffi-<br>cultés à dormir d'une traite, réveil matinal) .....                                                                | <input type="checkbox"/> |
| 4. Humeur dépressive (se sentir déprimée, triste, au bord<br>des larmes, manque d'énergie, sautes d'humeur).....                                                                   | <input type="checkbox"/> |
| 5. Irritabilité (sensation de nervosité, de stress, sensation<br>d'agressivité) .....                                                                                              | <input type="checkbox"/> |
| 6. Anxiété (sentiment d'angoisse, sensation de panique).....                                                                                                                       | <input type="checkbox"/> |
| 7. Fatigue physique et mentale (intellectuelle)<br>(diminution des performances en général, problèmes<br>de mémoire, diminution de la concentration,<br>tendance aux oublis) ..... | <input type="checkbox"/> |
| 8. Problèmes sexuels (changement du désir sexuel, de<br>l'activité sexuelle et de la satisfaction sexuelle) .....                                                                  | <input type="checkbox"/> |
| 9. Problèmes urinaires (difficultés à uriner, besoin croissant<br>d'uriner, incontinence).....                                                                                     | <input type="checkbox"/> |
| 10. Sécheresse vaginale (sensation de sécheresse ou<br>brûlures du vagin, difficultés lors des rapports sexuels) .....                                                             | <input type="checkbox"/> |
| 11. Gène musculaire et aux articulations (douleur aux<br>articulations, rhumatismes) .....                                                                                         | <input type="checkbox"/> |
