# Supplementary material
Source: PubMed Central journal article supplement (PMC183844)
Supplement: 1477-7525-1-28-S8.pdf [file 1477-7525-1-28-S8.pdf]

## MENOPOZ SEMPTOMLARINI DEĞERLENDİRME ÖLÇEĞİ (MRS)

Sevgili hanımlar. Menopoz semptomlarını değerlendirme ölçeğimizde belirtilen yakınmalarından yaşadıklarınız varsa lütfen bu yakınmaları ne düzeyde yaşadığınızı ölçeğimiz üzerinde işaretleyiniz. Şikayetinizin olmadığı yakınmalar için "hiç yok" seçeneğini işaretleyiniz.

### YAKINMALAR:

|                                                                                                                                         | Hiç yok                  | Hafif                    | Orta                     | Şiddetli                 | Çok şiddetli             |
|-----------------------------------------------------------------------------------------------------------------------------------------|--------------------------|--------------------------|--------------------------|--------------------------|--------------------------|
|                                                                                                                                         | -----                    | -----                    | -----                    | -----                    | -----                    |
| Puanlar =                                                                                                                               | 0                        | 1                        | 2                        | 3                        | 4                        |
| 1. Sıcak basması, terlemeler<br>(Terleme nöbetleri).....                                                                                | <input type="checkbox"/> | <input type="checkbox"/> | <input type="checkbox"/> | <input type="checkbox"/> | <input type="checkbox"/> |
| 2. Kalp rahatsızlıkları (Normalde hissetmediğiniz şekilde<br>kalpte sıkışma, tekleme, çarpıntı hissi).....                              | <input type="checkbox"/> | <input type="checkbox"/> | <input type="checkbox"/> | <input type="checkbox"/> | <input type="checkbox"/> |
| 3. Uyku sorunları (Uykuya dalmada güçlük,<br>uzun süre uyuyamama, erken uyanma).....                                                    | <input type="checkbox"/> | <input type="checkbox"/> | <input type="checkbox"/> | <input type="checkbox"/> | <input type="checkbox"/> |
| 4. Keyifsizlik hali (Kendini kötü, üzgün,<br>ağlamaklı hissetme, isteksizlik, ruh halinde değişiklik) .....                             | <input type="checkbox"/> | <input type="checkbox"/> | <input type="checkbox"/> | <input type="checkbox"/> | <input type="checkbox"/> |
| 5. Sinirlilik (Sinirlilik, gerginlik ve çabuk<br>öfkelenme hissi) .....                                                                 | <input type="checkbox"/> | <input type="checkbox"/> | <input type="checkbox"/> | <input type="checkbox"/> | <input type="checkbox"/> |
| 6. Endişe (İçsel huzursuzluk, panik hissi) .....                                                                                        | <input type="checkbox"/> | <input type="checkbox"/> | <input type="checkbox"/> | <input type="checkbox"/> | <input type="checkbox"/> |
| 7. Fiziksel ve zihinsel yorgunluk (Gün içinde yaptığı<br>işlerde azalma, hafızada zayıflama, konsantrasyon<br>zorluğu, unutkanlık)..... | <input type="checkbox"/> | <input type="checkbox"/> | <input type="checkbox"/> | <input type="checkbox"/> | <input type="checkbox"/> |
| 8. Cinsel sorunlar (Cinsel istekte, cinsel ilişkide<br>ve tatmin olmada değişiklik).....                                                | <input type="checkbox"/> | <input type="checkbox"/> | <input type="checkbox"/> | <input type="checkbox"/> | <input type="checkbox"/> |
| 9. İdrar sorunları (İdrar yaparken güçlük,<br>sık idrara çıkma, idrar kaçırma) .....                                                    | <input type="checkbox"/> | <input type="checkbox"/> | <input type="checkbox"/> | <input type="checkbox"/> | <input type="checkbox"/> |
| 10. Vajinada (haznede) kuruluk (Vajinada kuruluk<br>ve yanma hissi, cinsel birleşmede zorlanma) .....                                   | <input type="checkbox"/> | <input type="checkbox"/> | <input type="checkbox"/> | <input type="checkbox"/> | <input type="checkbox"/> |
| 11. Eklem ve kas rahatsızlıkları<br>(Eklemlerde ağrı, romatizmal şikayetler).....                                                       | <input type="checkbox"/> | <input type="checkbox"/> | <input type="checkbox"/> | <input type="checkbox"/> | <input type="checkbox"/> |
