# Supplementary material
Source: PubMed Central journal article supplement (PMC183844)
Supplement: 1477-7525-1-28-S10.pdf [file 1477-7525-1-28-S10.pdf]

## Menopause Rating Scale (MRS)

Yang manakah dari gejala-gejala yang tertera di bawah ini yang Anda alami sekarang ini dan seberapa berat atau ringankah gejala-gejala tersebut?

Tolong Anda berikan tanda 'X' di kotak yang tepat untuk setiap gejala yang tertera di bawah ini. Untuk gejala-gejala yang sekarang ini tidak Anda alami, berikan tanda 'X' di kotak nomor '0'.

|                                                                                                                                                | tidak ada                | ringan                   | menengah                 | berat                    | sangat berat             |
|------------------------------------------------------------------------------------------------------------------------------------------------|--------------------------|--------------------------|--------------------------|--------------------------|--------------------------|
|                                                                                                                                                | -----                    | -----                    | -----                    | -----                    | -----                    |
|                                                                                                                                                | 0                        | 1                        | 2                        | 3                        | 4                        |
| 1. Badan terasa sangat panas, berkeringat .....                                                                                                | <input type="checkbox"/> |
| 2. Rasa tidak nyaman pada jantung (detak jantung yan tidak biasa, jantung berdebar) .....                                                      | <input type="checkbox"/> |
| 3. Masalah tidur (susah tidur, susah untuk tidur nyenyak, bangun terlalu pagi) .....                                                           | <input type="checkbox"/> |
| 4. Perasaan tertekan (merasa tertekan, sedih, mudah menangis, tidak bergairah/lesu, mood yang berubah-ubah) .....                              | <input type="checkbox"/> |
| 5. Mudah marah (merasa gugup, rasa marah, agresif) .....                                                                                       | <input type="checkbox"/> |
| 6. Rasa resah (rasa gelisah, rasa panik) .....                                                                                                 | <input type="checkbox"/> |
| 7. Kelelahan fisik dan mental (menurunnya kinerja secara umum, berkurangnya daya ingat, menurunnya konsentrasi, mudah lupa/pikun) .....        | <input type="checkbox"/> |
| 8. Masalah-masalah seksual (perubahan dalam gairah seksual, aktifitas seksual dan kepuasan seksual) .....                                      | <input type="checkbox"/> |
| 9. Masalah-masalah pada kandung dan saluran kemih (sulit buang air kecil, sering buang air kecil, buang air kecil yang tidak terkontrol) ..... | <input type="checkbox"/> |
| 10. Kekeringan pada vagina (rasa kering atau terbakar, pada vagina, kesulitan dalam berhubungan intim) .....                                   | <input type="checkbox"/> |
| 11. Rasa tidak nyaman pada persendian dan otot (sakit pada persendian, kelhan rematik) .....                                                   | <input type="checkbox"/> |
